# Supplementary material
Source: PubMed Central journal article supplement (PMC11156430)
Supplement: NIHMS1995987-supplement-supp_data_and_methods.pdf [file NIHMS1995987-supplement-supp_data_and_methods.pdf]

## Item S1.

### Supplemental Methods

***Design and Validation of the NGS Nephropathy Panel.*** Two different custom target enrichment kits were tested in the validation process (Agilent and Illumina). These kits were designed to cover the exonic region of a total of 301 genes including 265 clinical genes that have known association with nephropathies as well as 36 'experimental' genes that are suspected to be involved in nephropathy but have not been formerly documented to result in human disease. For the purposes of clinical testing, the assay will be divided into multiple smaller panels including those for steroid resistant nephrotic syndrome/FSGS, Alport syndrome, cystic kidney disease, ciliopathies, developmental disorders with renal manifestations, thrombotic microangiopathy, C3 glomerulonephritis, and storage diseases with renal manifestations. The full list of genes targeted is included in table *a*. In the end, the Agilent SureSelect kit was selected based on the increased reproducibility of the results as well as the significantly shorter processing time. The Agilent kit was then optimized to ensure maximum coverage of the targeted region to minimize co-capture of non-target or homologous pseudogene sequences as much as possible.

We utilized the well characterized HapMap reference sample NA12878 for validation. This genome was selected due to the availability of a highly confident "gold standard" set of reference calls through the National Institutes of Standards and Technology (NIST), Genome in a Bottle Consortium and Illumina.<sup>1</sup> Thus, assay performance could be easily determined across the target region. The DNASTAR software utilized facilitates validation using this genome through comparison of variant calls generated in our laboratory.

Paired-end sequencing was performed on the MiSeq system using the PE v3 150 cycle kit. A batch size of 8 samples was selected in order to provide the optimum depth of coverage across the target region. We ran a total of 8 validation runs using this setup which included 9 of the NA12878 reference sample. These validation reference samples had a mean depth of 237X. Based on the NA12878 accuracy data we determined that the sensitivity and specificity are optimized at a minimum depth of 16X and therefore set 20X as a minimum depth to consider an exon adequately covered in order to provide a margin of safety. DNA from five cases that had a known pathogenic variant within a gene in the panel were tested during the validation process and the pathogenic variant was correctly identified in all cases.

***Utilization of assay on a series of renal biopsy samples.*** After assay validation, we sequenced extracted DNA from renal biopsy samples under an IRB-approved protocol (Schulman Associates IRB) in order to test the performance of the assay utilizing patient DNA. Since the current study was retrospective in nature and the study subjects were completely de-identified, the IRB waived the need for written consent from the patients. We sought to determine how commonly an identifiable genetic etiology of a patient's kidney disease can be detected in cases where the pathogenesis is undetermined after renal biopsy. We included biopsies from patients <40 years of age with either idiopathic focal segmental glomerulosclerosis or cases without FSGS that show at least moderate chronic injury with no discernable etiology either by biopsy or clinical parameters. A relatively young cutoff age was chosen for inclusion in an effort to enrich study population for cases with a monogenic etiology. Idiopathic focal segmental glomerulosclerosis was defined as biopsy evidence of FSGS in which the clinical indication for the biopsy was proteinuria. Patients with secondary etiologies for the FSGS were excluded. This would include biopsy evidence of other forms of glomerulopathy which commonly result in FSGS lesions (e.g. IgA nephropathy) or clinical evidence of a disease known to result in secondary FSGS. Cases without FSGS lesions were included if at least moderate chronic injury was present by renal biopsy (>30% interstitial fibrosis in the renal cortex) and there was no known clinical or pathologic etiology of the chronic injury.

A total of 50 consecutive renal biopsies with adequate DNA that met inclusion criteria were sequenced. DNA for each case was extracted from the frozen tissue leftover after immunofluorescence evaluation was complete.

The fastq files generated by the MiSeq were streamed to Illumina BaseSpace where the data was assembled with the BWA Genome Alignment Software and the variants called by GATK Variant Caller. This produced a VCF which can be imported into Illumina Variant Studio. The fastq files were also imported into DNASTAR's SeqMan NGen (SM NGen) assembler and the data interrogated in DNASTAR ArrayStar and SeqMan Pro. We found high correlation between the variant calls provided by these two software pipelines (>99.9%). Both the Illumina and DNASTAR programs allow filtering for rare variants. We filtered for coding variants with a minor allele frequency (MAF) less than <1% and also manually looked for coding variants in APOL1 and NPHS2 which are known to be pathogenic but have a MAF above the cutoff. Variants were considered disease causing under strict criteria as previously described<sup>2</sup> and in accordance with the recently published ACMG guidelines for the interpretation of sequence variants.<sup>3</sup> The FSGS cases were classified according to the Columbia Classification.<sup>4</sup>

#### Works Cited

1. Zook JM, Chapman B, Wang J, et al. Integrating human sequence data sets provides a resource of benchmark SNSNP and indel genotype calls. *Nat Biotechnol*. 2014; 32: 246-251.
2. Sadowski CE, Lovric S, Ashraf S, et al. A single-gene cause in 29.5% of cases of steroid-resistant nephrotic syndrome. *J Am Soc Nephrol*. 2015; 26: 1279-1289.
3. Richards S, Aziz N, Bale S, et al. Standards and guidelines for the interpretation of sequence variants: a joint consensus recommendation of the American College of Medical Genetics and Genomics and the Association for Molecular Pathology. *Genet Med*. 2015; 17: 405-424.
4. D'Agati VD, Fogo A, Bruijn JA, Jennette JC. Pathologic classification of focal segmental glomerulosclerosis: a working proposal. *Am J Kidney Dis*. 2004; 43: 368-382.

**Table a. Genes included in the NGS nephropathy panel.**

| Location      | Gene      | Disease                                              |
|---------------|-----------|------------------------------------------------------|
| 1p21.3        | ABCD3     | Zellweger syndrome 2                                 |
| 17q23.3       | ACE       | Renal tubular dysgenesis                             |
| 19q13         | ACTN4     | FSGS                                                 |
| 9q34          | ADAMTS13  | TTP                                                  |
| 1q42.13       | ADCK3     | SRNS                                                 |
| 1q24          | ADCY10*   | Absorptive hypercalciuria type 2                     |
| 1q42.2        | AGT       | Absence or paucity of proximal tubules, fetal anuria |
| 3q24          | AGTR1     | Renal adysplasia                                     |
| 2q37.3        | AGXT      | Type I primary hyperoxaluria                         |
| 6q23.3        | AHI1      | Joubert syndrome                                     |
| 2p13          | ALMS1     | Alstrom syndrome                                     |
| 9q22.33       | ANKS6     | Nephronophthisis                                     |
| 11q23-q24     | APOA1     | Amyloidosis                                          |
| 1q23.3        | APOA2     | Amyloidosis                                          |
| 19q13.2       | APOE      | Lipoprotein glomerulopathy                           |
| 22q13.1       | APOL1     | FSGS                                                 |
| 16q24         | APRT      | 2-8 DHA deficiency                                   |
| 12q12-q13     | AQP2      | Bartter syndrome, type 4b                            |
| 4q22.1        | ARHGAP24* | Murine FSGS                                          |
| Xq28          | ARHGAP4   | Nephrogenic diabetes insipidous                      |
| 17q25.3       | ARHGDI1A  | Congenital nephrotic syndrome                        |
| 3q11.1        | ARL13B    | Joubert syndrome 8                                   |
| 3q11.2        | ARL6      | Bardet-Biedl                                         |
| 7q34          | ATP6V0A4  | Primary distal renal tubular acidosis                |
| 2q13.1        | ATP6V1B1  | Primary distal renal tubular acidosis                |
| 22q13.31      | ATXN10    | Nephronophthisis                                     |
| Xq28          | AVPR2     | Nephrogenic diabetes insipidous                      |
| 15q21-q22.2   | B2M       | Amyloidosis                                          |
| 17p11.2       | B9D1      | Dysplastic kidney, meckel's syndrome                 |
| 19q13.2       | B9D2      | Cystic kidneys, meckel's syndrome                    |
| 11q13         | BBS1      | Bardet-Biedl                                         |
| 12q21.2       | BBS10     | Bardet-Biedl                                         |
| 4q27          | BBS12     | Bardet-Biedl                                         |
| 16q21         | BBS2      | Bardet-Biedl                                         |
| 15q22.3-q23   | BBS4      | Bardet-Biedl                                         |
| 2q31.1        | BBS5      | Bardet-Biedl                                         |
| 4q27          | BBS7      | Bardet-Biedl                                         |
| 7p14          | BBS9      | Bardet-Biedl                                         |
| 2q33          | BCS1L     | Early onset Toni-Debré-Fanconi Syndrome              |
| 14q22-q23     | BMP4      | Renal hypodysplasia                                  |
| 1p32.1        | BSND      | Bartter syndrome with sensorineural deafness         |
| 1p36.12       | C1QA      | Systemic lupus erythematosus and glomerulonephritis  |
| 1p36.12       | C1QB      | Systemic lupus erythematosus and glomerulonephritis  |
| 1p36.11       | C1QC      | Systemic lupus erythematosus and glomerulonephritis  |
| 12p13         | C1S       | Atypical HUS                                         |
| 6p21.3        | C2        | Complement component 2 deficiency                    |
| 19p13.3-p13.2 | C3        | Atypical HUS/C3 GN                                   |

|                       |                |                                                                                      |
|-----------------------|----------------|--------------------------------------------------------------------------------------|
| <b>12p13.31</b>       | C3AR1*         | Atypical HUS                                                                         |
| <b>5p13.2</b>         | C5orf42        | Joubert syndrome 17                                                                  |
| <b>1p32.1</b>         | C8A            | Complement C8 alpha-gamma deficiency                                                 |
| <b>5p14-p12</b>       | C9             | C9 deficiency                                                                        |
| <b>8q22</b>           | CA2            | Primary proximal renal tubular acidosis                                              |
| <b>3q13</b>           | CASR           | Familial hypocalciuric hypercalcemia and neonatal severe primary hyperparathyroidism |
| <b>4p15.32</b>        | CC2D2A         | Joubert syndrome, meckel's syndrome                                                  |
| <b>12q22</b>          | CEP83 (CCDC41) | Nephronophthisis                                                                     |
| <b>11p15.5</b>        | CD151          | Nephropathy with pretibial epidermolysis bullosa and deafness                        |
| <b>6p12</b>           | CD2AP          | FSGS                                                                                 |
| <b>1q32</b>           | CD46           | Atypical HUS and C3 GN                                                               |
| <b>9q22.33</b>        | CDC14B*        | Zebrafish ciliopathy                                                                 |
| <b>1p36.1</b>         | CDC42*         | Zebrafish ciliopathy                                                                 |
| <b>11q23.3</b>        | CEP164         | Nephronophthisis 15                                                                  |
| <b>12q21.32</b>       | CEP290         | Joubert syndrome, meckel's syndrome                                                  |
| <b>7q32.3</b>         | CEP41          | Joubert Syndrome 15                                                                  |
| <b>6p21.3</b>         | CFB            | Atypical HUS/C3 GN                                                                   |
| <b>1q32</b>           | CFH            | Atypical HUS/C3 GN                                                                   |
| <b>1q32</b>           | CFHR1          | Atypical HUS/C3 GN                                                                   |
| <b>1q31.3</b>         | CFHR2          | Atypical HUS/C3 GN                                                                   |
| <b>1q32</b>           | CFHR3          | Atypical HUS/C3 GN                                                                   |
| <b>1q32</b>           | CFHR4          | Atypical HUS/C3 GN                                                                   |
| <b>1q31.3</b>         | CFHR5          | Atypical HUS/C3 GN                                                                   |
| <b>4q25</b>           | CFI            | Atypical HUS/C3 GN                                                                   |
| <b>8q12.2</b>         | CHD7           | CHARGE syndrome                                                                      |
| <b>7q35</b>           | CLCN1          | recessive generalized myotonia congenita (Becker) and dominant myotonia (Thomsen)    |
| <b>Xp11.23-p11.22</b> | CLCN5          | Dent disease                                                                         |
| <b>1p36</b>           | CLCNKA         | Bartter syndrome type 3, Bartter syndrome, type 4b                                   |
| <b>1p36</b>           | CLCNKB         | Bartter syndrome, type 3                                                             |
| <b>3q28</b>           | CLDN16         | Familial hypomagnesemia with hypercalciuria and nephrocalcinosis                     |
| <b>1p34.2</b>         | CLDN19         | Familial hypomagnesemia with hypercalciuria and nephrocalcinosis                     |
| <b>16p13.3</b>        | CLUAP1*        | Zebrafish ciliopathy                                                                 |
| <b>2q36-q37</b>       | COL4A3         | Alport                                                                               |
| <b>2q35-q37</b>       | COL4A4         | Alport                                                                               |
| <b>Xq22</b>           | COL4A5         | Alport                                                                               |
| <b>Xq22</b>           | COL4A6         | Alport                                                                               |
| <b>4q21.23</b>        | COQ2           | COQ2 nephropathy                                                                     |
| <b>9q34.11</b>        | COQ4*          | No renal manifestations reported                                                     |
| <b>14q24.3</b>        | COQ6           | Steroid resistant nephrotic syndrome                                                 |
| <b>16q21</b>          | COQ9           | Coenzyme Q10 deficiency                                                              |
| <b>17p12</b>          | COX10          | Proximal tubulopathy                                                                 |
| <b>1p32</b>           | CPT2           | Canntitine palmitoyltransferase II deficiency (myoglobinuria)                        |
| <b>1q32</b>           | CR2            | complement abnormalities/immunodeficiency                                            |
| <b>9q33.3</b>         | CRB2           | Steroid res nephrotic syndrome                                                       |
| <b>17p13</b>          | CTNS           | Cystinosis                                                                           |
| <b>20q13.1</b>        | CTSA           | Galactosialidosis                                                                    |
| <b>10p12.31</b>       | CUBN*          | Megaloblastic anemia                                                                 |

|                       |         |                                                                   |
|-----------------------|---------|-------------------------------------------------------------------|
| <b>8q21-q22</b>       | CYP11B2 | Corticosterone methyl oxidase deficiency                          |
| <b>2p25.1</b>         | CYS1*   | murine cystic kidneys                                             |
| <b>5p13.1</b>         | DAB2*   | Dent's disease                                                    |
| <b>13q22</b>          | DACH1   | Renal hypodysplasia                                               |
| <b>Xp22.11</b>        | DDX53   | Nephrotic syn (ASN 2013)                                          |
| <b>17q22</b>          | DGKE    | TMA and FSGS                                                      |
| <b>2p13</b>           | DGUOK   | recurrent rhabdomyolysis                                          |
| <b>1q32.1</b>         | DSTYK   | CAKUT                                                             |
| <b>11q21-q22.1</b>    | DYNC2H1 | Multicystic kidneys                                               |
| <b>11q13.1</b>        | EFEMP2  | cutis laxa                                                        |
| <b>3q26.3-q28</b>     | EHHADH  | Renal fanconi                                                     |
| <b>4q25</b>           | ENPEP*  | Kidney development in zebrafish                                   |
| <b>15q23-q25</b>      | ETFA    | Glutaric acidemia type 2                                          |
| <b>19q13.3</b>        | ETFB    | Glutaric acidemia type 2                                          |
| <b>4q32-q35</b>       | ETFDH   | Glutaric acidemia type 2                                          |
| <b>4p16</b>           | EVC     | Ellis van Creveld syndrome                                        |
| <b>4p16.2-p16.1</b>   | EVC2    | Ellis van Creveld syndrome                                        |
| <b>14q22.3</b>        | EXOC5*  | Pronephros development                                            |
| <b>8q13.3</b>         | EYA1    | Branchio-oto-renal syndrome                                       |
| <b>5q35.3</b>         | F12     | Hereditary angioedema                                             |
| <b>15q13.2-q13.3</b>  | FAN1    | Karyomegalic nephropathy                                          |
| <b>4q35</b>           | FAT1*   | Nephrophthisis and fsgs (ASN 2013)                                |
| <b>14q32.1</b>        | FBLN5   | Autosomal recessive cutis laxa type 1B                            |
| <b>9q34</b>           | FCN1    | Atypical HUS                                                      |
| <b>4q28</b>           | FGA     | Amyloidosis                                                       |
| <b>12p13.3</b>        | FGF23   | Hereditary hypophosphatemic rickets                               |
| <b>8p11.23-p11.22</b> | FGFR1   | Kallmann syndrome 2 and hypophosphatemic rickets                  |
| <b>2q34</b>           | FN1     | Fibronectin glomerulopathy                                        |
| <b>5q13.2</b>         | FOXD1*  | Kidney development in zebrafish                                   |
| <b>4q21.21</b>        | FRAS1   | Fraser syndrome/CAKUT                                             |
| <b>13q13.3</b>        | FREM2   | Fraser syndrome/CAKUT                                             |
| <b>11q23</b>          | FXYD2   | Renal Hypomagnesemia-2                                            |
| <b>17q21</b>          | G6PC    | Glycogen storage disease type I                                   |
| <b>2q24-q31</b>       | GALNT3  | Tumoral calcinosis, hyperphosphatemic,                            |
| <b>1q21</b>           | GBA     | Gaucher disease                                                   |
| <b>Xq22</b>           | GLA     | Fabry's disease                                                   |
| <b>7p21.3</b>         | GLCCI1* | Murine FSGS                                                       |
| <b>16p13.3</b>        | GLIS2   | Nephronophthisis                                                  |
| <b>12q23.2</b>        | GNPTAB  | I-cell/ mucopolipidosis II                                        |
| <b>Xq26.1</b>         | GPC3    | Simpson golabi behmel syndrome                                    |
| <b>13q32</b>          | GPC5*   | Susceptibility to nephrotic syndrome                              |
| <b>9q12</b>           | GRHPR   | Primary hyperoxaluria                                             |
| <b>9q33.3</b>         | GSN     | amyloidosis                                                       |
| <b>10q24</b>          | HIF1AN* | Zebrafish ciliopathy                                              |
| <b>17q12</b>          | HNF1B   | Renal cysts and diabetes syndrome, Glomerulocystic kidney disease |
| <b>Xq26.1</b>         | HPRT1   | Lesch-Nyhan syndrome                                              |
| <b>16q22</b>          | HSD11B2 | Apparent mineralcorticoid excess syndrome                         |
| <b>3q21</b>           | IFT122  | Cranioectodermal dysplasia-1                                      |

|                        |        |                                                                     |
|------------------------|--------|---------------------------------------------------------------------|
| <b>16p13.3</b>         | IFT140 | Nephronophthisis                                                    |
| <b>17q11.2</b>         | IFT20* | Murine nephronophthisis                                             |
| <b>14q24.3</b>         | IFT43  | Cranioectodermal dysplasia-3                                        |
| <b>3q25.33</b>         | IFT80  | Asphyxiating thoracic dystrophy 2                                   |
| <b>13q12.1</b>         | IFT88* | Murine nephronophthisis                                             |
| <b>14q32.33</b>        | INF2   | FSGS                                                                |
| <b>9q34</b>            | INPP5E | Nephronophthisis                                                    |
| <b>9q31</b>            | INVS   | Nephronophthisis type 2                                             |
| <b>3q13.33; 3q21.1</b> | IQCB1  | Senior-Loken syndrome type 5                                        |
| <b>17q21.33</b>        | ITGA3  | Nephrotic syndrome                                                  |
| <b>10p13</b>           | ITGA8  | Bilateral renal agenesis                                            |
| <b>10p11.2</b>         | ITGB1* | Murine cystic kidneys                                               |
| <b>17q25.3</b>         | ITGB4  | Congenital FSGS                                                     |
| <b>20p12.1-p11.23</b>  | JAG1   | Alagille syndrome                                                   |
| <b>Xp22.32</b>         | KAL1   | Kallmann syndrome                                                   |
| <b>11q24</b>           | KCNJ1  | Barter syndrome                                                     |
| <b>17p11.2</b>         | KCNJ18 | Thyrotoxic hypokalemic periodic paralysis                           |
| <b>11p15.5</b>         | KCNQ1  | Jervell and Lange-Nielsen syndrome and familial atrial fibrillation |
| <b>5q31</b>            | KIF3A* | Murine cystic kidneys                                               |
| <b>15q26.1</b>         | KIF7   | Nephronophthisis-medullary cystic disease                           |
| <b>1q32</b>            | KISS1  | Kallmann syndrome                                                   |
| <b>13q12.1</b>         | KL     | Hyperphosphatemic familial tumoral calcinosis                       |
| <b>3p21</b>            | LAMB2  | Pierson syndrome                                                    |
| <b>16q22.1</b>         | LCAT   | Lecithin cholesterol acyltransferase deficiency                     |
| <b>9q33.3</b>          | LMX1B  | Nail-patella                                                        |
| <b>2q31.1</b>          | LRP2   | Facio-oculoacoustico-renal syndrome                                 |
| <b>8q24.22</b>         | LRR6*  | Primary ciliary dyskinesia-19                                       |
| <b>12q15</b>           | LYZ    | Amyloidosis                                                         |
| <b>3q27-q28</b>        | MASP1  | Atypical HUS                                                        |
| <b>1p36.3-p36.2</b>    | MASP2  | Atypical HUS                                                        |
| <b>16p13.3</b>         | MEFV   | Familial Mediterranean Fever                                        |
| <b>20p12.1-p11.23</b>  | MKKS   | Bardet-Biedl syndrome type 6                                        |
| <b>17q22</b>           | MKS1   | Meckel syndrome type 1                                              |
| <b>1p34.1</b>          | MMACHC | Cobalamin C deficiency                                              |
| <b>3q23</b>            | MRPS22 | COMBINED OXIDATIVE PHOSPHORYLATION DEFICIENCY 5                     |
| <b>1q21</b>            | MUC1   | Medullary cystic kidney disease-1                                   |
| <b>6p12.3</b>          | MUT    | Methylmalonic acidemia                                              |
| <b>12q24</b>           | MVK    | AA amyloidosis, hyper IgD syndrome                                  |
| <b>22q13.1</b>         | MYH9   | MYH9-related disorder                                               |
| <b>15q21-q22</b>       | MYO1E  | FSGS                                                                |
| <b>2p13.2</b>          | NAT8*  | GWAS CKD suspected gene                                             |
| <b>2p13.1</b>          | NAT8B* | GWAS CKD suspected gene                                             |
| <b>15q24.2</b>         | NEIL1* | Candidate in SRNS patient                                           |
| <b>4q33</b>            | NEK1*  | Murine cystic kidneys                                               |
| <b>17q11.1</b>         | NEK8*  | Nephrophthisis                                                      |
| <b>6p21.3</b>          | NEU1   | Sialidosis                                                          |
| <b>1q44</b>            | NLRP3  | Muckle-Wells syndrome                                               |
| <b>1p13-p11</b>        | NOTCH2 | Alagille syndrome                                                   |

|                     |          |                                                                  |
|---------------------|----------|------------------------------------------------------------------|
| <b>2q13.1</b>       | NPHP1    | Senior-Loken syndrome type 1                                     |
| <b>3q22.1</b>       | NPHP3    | Nephronophthisis type 3                                          |
| <b>1p36</b>         | NPHP4    | Nephronophthisis type 4                                          |
| <b>19q13.1</b>      | NPHS1    | Finnish nephropathy                                              |
| <b>1q25.2</b>       | NPHS2    | Steroid resistant nephrotic syndrome                             |
| <b>4q31.1</b>       | NR3C2    | Pseudohypoaldosteronism type 1                                   |
| <b>Xq22</b>         | NXF5     | FSGS                                                             |
| <b>Xq25</b>         | OCRL     | Lowe's/Dent                                                      |
| <b>Xp22</b>         | OFD1     | Oral-facial-digital syndrome                                     |
| <b>2p24.1</b>       | OSR1*    | Kidney size and function                                         |
| <b>8q22.2</b>       | OSR2*    | Murine kidney development                                        |
| <b>12q24</b>        | P2RX7*   | Zebrafish polycystic disease model                               |
| <b>10q24</b>        | PAX2     | Oligomeganephronia                                               |
| <b>10p12.1</b>      | PDSS1*   | Coenzyme Q10 deficiency and murine kidney disease                |
| <b>6q21</b>         | PDSS2    | Coenzyme Q10 deficiency                                          |
| <b>7q21.2</b>       | PEX1     | Zellweger's syndrome                                             |
| <b>1p36.32</b>      | PEX10    | Zellweger's syndrome                                             |
| <b>17q12</b>        | PEX12    | Zellweger's syndrome                                             |
| <b>2p16.1</b>       | PEX13    | Zellweger's syndrome                                             |
| <b>1p36.22</b>      | PEX14    | Zellweger's syndrome                                             |
| <b>11p11.2</b>      | PEX16    | Zellweger's syndrome                                             |
| <b>1q23.2</b>       | PEX19    | Zellweger's syndrome                                             |
| <b>8q21.1</b>       | PEX2     | Zellweger's syndrome                                             |
| <b>22q11.21</b>     | PEX26    | Zellweger's syndrome                                             |
| <b>6q24.2</b>       | PEX3     | Zellweger's syndrome                                             |
| <b>12p13.31</b>     | PEX5     | Zellweger's syndrome                                             |
| <b>6p21.1</b>       | PEX6     | Zellweger's syndrome                                             |
| <b>6q23.3</b>       | PEX7     | Zellweger's syndrome                                             |
| <b>Xp22.2-p22.1</b> | PHEX     | Hereditary hypophosphatemic rickets                              |
| <b>10p13</b>        | PHYH     | Refsum's disease                                                 |
| <b>16p13.3</b>      | PKD1     | ADPKD                                                            |
| <b>4q22.1</b>       | PKD2     | ADPKD                                                            |
| <b>6p12.2</b>       | PKHD1    | ARPKD                                                            |
| <b>8q23</b>         | PKHD1L1  | ARPKD                                                            |
| <b>10q23</b>        | PLCE1    | FSGS                                                             |
| <b>6q26</b>         | PLG      | Plasminogen deficiency                                           |
| <b>7q32-q33</b>     | PODXL*   | FSGS                                                             |
| <b>2p21</b>         | PREPL    | Hypotonia-cystinuria syndrome                                    |
| <b>20p12.3</b>      | PROKR2   | Kallmann syndrome                                                |
| <b>Xq22.3</b>       | PRPS1    | 5-PPS Superactivity and Arts Syndrome                            |
| <b>12p13.3</b>      | PTPRO    | FSGS                                                             |
| <b>1q32</b>         | REN      | Renal dysplasia                                                  |
| <b>16q12.2</b>      | RPGRIP1L | Joubert syndrome type 7                                          |
| <b>8q23.1</b>       | RRM2B    | Proximal Tubulopathy                                             |
| <b>16q12.1</b>      | SALL1    | Townes-brocks                                                    |
| <b>19q13.2</b>      | SARS2    | Tubulointerstitial disease with salt wasting and hypomagnesaemia |
| <b>4q21.1</b>       | SCARB2   | FSGS                                                             |
| <b>12p13</b>        | SCNN1A   | Pseudohypoaldosteronism type 1                                   |

|                      |          |                                                             |
|----------------------|----------|-------------------------------------------------------------|
| <b>16p12.2-p12.1</b> | SCNN1B   | Pseudohypoaldosteronism type 1                              |
| <b>16p12.2-p12.1</b> | SCNN1G   | Pseudohypoaldosteronism type 1                              |
| <b>1q43</b>          | SDCCAG8  | Retinal-renal ciliopathy                                    |
| <b>14q23.1</b>       | SIX1     | Branchio-oto-renal syndrome                                 |
| <b>2p21</b>          | SIX2     | Anomalous Kidney Development                                |
| <b>19q13.32</b>      | SIX5     | Branchio-oto-renal syndrome                                 |
| <b>15q15-q21.1</b>   | SLC12A1  | Bartter syndrome                                            |
| <b>16q13</b>         | SLC12A3  | Gitelman syndrome                                           |
| <b>6p21.3</b>        | SLC17A3* | Gout                                                        |
| <b>6q13</b>          | SLC17A5  | Salla disease                                               |
| <b>9p24</b>          | SLC1A1   | Dicarboxylic aminoaciduria                                  |
| <b>11q13.1</b>       | SLC22A12 | Renal hypouricemia type 1                                   |
| <b>3q26.1-q26.2</b>  | SLC2A2   | Fanconi-Bickel                                              |
| <b>4p16.1</b>        | SLC2A9   | Renal hypouricemia                                          |
| <b>5q35.3</b>        | SLC34A1  | Fanconi renotubular syndrome                                |
| <b>9q34</b>          | SLC34A3  | hypercalciuria                                              |
| <b>11q23.2</b>       | SLC37A4  | Glycogen storage disease 1b                                 |
| <b>2p16.3</b>        | SLC3A1   | Cystinuria                                                  |
| <b>1q32.1</b>        | SLC41A1  | Nephronophthisis                                            |
| <b>17q21.31</b>      | SLC4A1   | Primary distal renal tubular acidosis                       |
| <b>4q21</b>          | SLC4A4   | Primary proximal renal tubular acidosis                     |
| <b>16p11.2</b>       | SLC5A2   | Glucosuria                                                  |
| <b>5p15.33</b>       | SLC6A19  | Hartnup's disease                                           |
| <b>14q11.2</b>       | SLC7A7   | Lysinuric protein intolerance                               |
| <b>19q13.1</b>       | SLC7A9   | Cystinuria                                                  |
| <b>17q25.1</b>       | SLC9A3R1 | Hypophosphatemic nephrolithiasis/osteoporosis type 2        |
| <b>2q35-q37</b>      | SMARCAL1 | Schimke immunoosseous dysplasia (SIOD)and renal dysfunction |
| <b>9q34.2</b>        | SURF1    | Leigh disease with cytochrome c oxidase deficiency          |
| <b>12q24.11</b>      | TCTN1    | Joubert syndrome                                            |
| <b>12q24.31</b>      | TCTN2    | Meckel syndrome type 8                                      |
| <b>10q24.1</b>       | TCTN3    | Joubert syndrome 18                                         |
| <b>20p11.2</b>       | THBD     | Atypical hemolytic uremic syndrome                          |
| <b>11q12.2</b>       | TMEM138  | Joubert Syndrome                                            |
| <b>11q13.1</b>       | TMEM216  | Meckel-Gruber Syndrome Type 2                               |
| <b>16q23.1</b>       | TMEM231  | Joubert                                                     |
| <b>2q33.2</b>        | TMEM237  | Joubert syndrome-14                                         |
| <b>8q22.1</b>        | TMEM67   | Meckel syndrome type 3 and Joubert syndrome type 6          |
| <b>12p13.2</b>       | TNFRSF1A | Amyloidosis, familial periodic fever                        |
| <b>16p13.3</b>       | TRAP1    | CAKUT and VACTERL                                           |
| <b>99q33.1</b>       | TRIM32   | Bardet-biedel                                               |
| <b>11q22.1</b>       | TRPC6    | Steroid resistant nephrotic syndrome                        |
| <b>15q21</b>         | TRPM7*   | Zebrafish kidney function                                   |
| <b>9q34</b>          | TSC1     | Tuberous sclerosis                                          |
| <b>16p13.3</b>       | TSC2     | Tuberous sclerosis                                          |
| <b>2q24.3</b>        | TTC21B   | Nephronophthisis and fsgs                                   |
| <b>14q31.3</b>       | TTC8     | Bardet-Biedl syndrome                                       |
| <b>18q12.1</b>       | TTR      | Amyloidosis                                                 |
| <b>16p12.3</b>       | UMOD     | Medullary cystic kidney disease-2                           |



|                    |          |                                                            |
|--------------------|----------|------------------------------------------------------------|
| <b>22q13.31</b>    | UPK3A    | Renal adysplasia                                           |
| <b>6p12</b>        | VEGFA*   | Murine kidney disease                                      |
| <b>3p25.3</b>      | VHL      | Von Hippel-Lindau                                          |
| <b>14q24.3-q31</b> | VIPAS39  | Arthrogryposis, renal dysfunction and cholestasis syndrome |
| <b>15q26.1</b>     | VPS33B   | Arthrogryposis-renal dysfunction-cholestasis               |
| <b>12p13.3</b>     | VWF      | Von willebrand's disease                                   |
| <b>2p15</b>        | WDR35    | Bardet-Biedl syndrome 15                                   |
| <b>4p14</b>        | WDR19    | Jeune syndrome                                             |
| <b>2p24.1</b>      | WDR35    | Cranioectodermal dysplasia                                 |
| <b>11p13</b>       | WT1      | Steroid resistant nephrotic syndrome                       |
| <b>3q23-q24</b>    | WWTR1*   | Zebrafish kidney development                               |
| <b>22q13.2</b>     | XPNPEP3  | Nephronophthisis                                           |
| <b>1p34</b>        | ZMPSTE24 | Mandibuloacral dysplasia and restrictive dermopathy        |
| <b>3p21.3</b>      | ZMYND10  | Primary ciliary dyskinesia                                 |
| <b>16q12</b>       | ZNF423   | Nephronophthisis-14 and Joubert syndrome-19                |

\*designates experimental gene

Abbreviations: ADPKD, autosomal dominant polycystic kidney disease; ARPKD, autosomal recessive polycystic kidney disease; CAKUT, congenital anomalies of the kidney and urinary tract; CKD, chronic kidney disease; FSGS, focal segmental glomerulosclerosis, GN, glomerulonephritis; SRNS, steroid resistant nephrotic syndrome; TTP, Thrombotic Thrombocytopenic Purpura

**Table b. NA12878 variant call precision and reproducibility at a depth of 20X**

|                         |        |
|-------------------------|--------|
| True positive rate      | 100%   |
| False negative rate     | 0%     |
| True negative rate      | 99.94% |
| False positive rate     | 0.018% |
| Variant reproducibility | 99.6%  |

**Table c. Percent of cases with an identified monogenic etiology by race.**

| Race             | Mean age (range) | M/F   | Total | Genetic etiology | No genetic etiology | % Genetic |
|------------------|------------------|-------|-------|------------------|---------------------|-----------|
| Caucasian        | 22.0 (5-35)      | 7/8   | 15    | 5                | 10                  | 33.3%     |
| African American | 24.5 (2-38)      | 11/10 | 21    | 16               | 5                   | 76.2%     |
| Hispanic         | 25.6 (3-37)      | 5/6   | 11    | 2                | 9                   | 18.2%     |
| Other            | 27.7 (21-37)     | 0/3   | 3     | 0                | 3                   | 0%        |

**Table d. Clinical and genetic findings in 50 consecutive renal biopsies studied.**

| Patient # | Clinicopathologic diagnosis | Serum Cr (mg/dL) | Proteinuria (grams/day) | Age | Gender | Ethnicity | Gene   | Variant                              | Zygoty                | Classified*        | dbSNP ID                   |
|-----------|-----------------------------|------------------|-------------------------|-----|--------|-----------|--------|--------------------------------------|-----------------------|--------------------|----------------------------|
| 1         | CKD                         | 2.5              | 2.3                     | 31  | M      | Af Am     | APOL1  | c.1024A>G (G1)                       | Homozygous            | Variant pathogenic | rs73885319                 |
| 2         | CKD                         | 3.7              | 1.8                     | 37  | F      | Af Am     | APOL1  | c.1164delTTATAA (G2), c.1024A>G (G1) | Compound heterozygous | Variant pathogenic | rs73885319 and rs143830837 |
| 3         | CKD                         | 4                | 3.2                     | 33  | F      | Af Am     | APOL1  | c.1024A>G (G1)                       | Homozygous            | Variant pathogenic | rs73885319                 |
| 4         | CKD                         | 3                | 4                       | 38  | M      | Af Am     | APOL1  | c.1024A>G (G1)                       | Homozygous            | Variant pathogenic | rs73885319                 |
| 5         | CKD                         |                  | 1.5                     | 24  | F      | Af Am     | APOL1  | c.1024A>G (G1)                       | Homozygous            | Variant pathogenic | rs73885319                 |
| 6         | CKD                         | 1                | 2.7                     | 15  | F      | Cau       | COL4A6 | c.2422G>A                            | Heterozygous          | VUS                | rs143895379                |
| 7         | CKD                         | 13.4             |                         | 21  | M      | Af Am     | CRB2   | c.3373G>T and c.2519C>G              | unknown               | VUS                | rs61740212 and rs543547663 |
| 8         | CKD                         | 2.4              | 0.4                     | 25  | F      | Cau       | NPHP1  | whole gene deletion                  | Homozygous            | Variant pathogenic | none                       |
| 9         | CKD                         | 2.6              | 0.5                     | 21  | M      | His       |        |                                      |                       | none               |                            |
| 10        | CKD                         | 1                | 1                       | 12  | F      | His       |        |                                      |                       | None               |                            |
| 11        | CKD                         | 3.5              | 4.4                     | 35  | M      | His       |        |                                      |                       | None               |                            |
| 12        | CKD                         | 1.5              | 2.8                     | 32  | F      | His       |        |                                      |                       | None               |                            |
| 13        | CKD                         | 3.5              | 3                       | 25  | F      | Mid East  |        |                                      |                       | None               |                            |
| 14        | CKD                         | 4.1              | 1                       | 19  | F      | Cau       |        |                                      |                       | None               |                            |
| 15        | FSGS                        | 1.7              | 29                      | 14  | M      | Af Am     | APOL1  | c.1164delTTATAA (G2)                 | Homozygous            | Variant pathogenic | rs143830837                |
| 16        | FSGS                        | 2.7              | 12                      | 36  | M      | Af Am     | APOL1  | c.1164delTTATAA (G2), c.1024A>G (G1) | Heterozygous          | Variant pathogenic | rs73885319 and rs143830837 |
| 17        | FSGS                        | 0.5              | 3.3                     | 10  | F      | Af Am     | APOL1  | c.1024A>G (G1)                       | Homozygous            | Variant pathogenic | rs73885319                 |
| 18        | FSGS                        | 1                | 2.5                     | 17  | F      | Af Am     | APOL1  | c.1164delTTATAA (G2), c.1024A>G (G1) | Compound heterozygous | Variant pathogenic | rs73885319 and rs143830837 |
| 19        | FSGS                        | 0.7              | 2.2                     | 28  | F      | Af Am     | APOL1  | c.1024A>G (G1)                       | Homozygous            | Variant pathogenic | rs73885319                 |
| 20        | FSGS                        | 1                | 4                       | 29  | F      | Af Am     | APOL1  | c.1164delTTATAA (G2), c.1024A>G (G1) | Compound heterozygous | Variant pathogenic | rs73885319 and rs143830837 |

|    |      |      |     |    |   |       |        |                                      |                       |                           |                             |
|----|------|------|-----|----|---|-------|--------|--------------------------------------|-----------------------|---------------------------|-----------------------------|
| 21 | FSGS | 0.5  | 5   | 2  | M | Af Am | APOL1  | c.1024A>G (G1)                       | Homozygous            | Variant pathogenic        | rs73885319                  |
| 22 | FSGS | 17.7 | 5.4 | 31 | M | Af Am | APOL1  | c.1024A>G (G1)                       | Homozygous            | Variant pathogenic        | rs73885319                  |
| 23 | FSGS | 1.8  | 5   | 37 | F | Af Am | APOL1  | c.1164delTTATAA (G2)                 | Homozygous            | Variant pathogenic        | rs143830837                 |
| 24 | FSGS | 4.1  | 27  | 22 | F | Af Am | APOL1  | c.1164delTTATAA (G2), c.1024A>G (G1) | Compound heterozygous | Variant pathogenic        | rs73885319 and rs143830837  |
| 25 | FSGS | 3.2  | 5.7 | 22 | M | Af Am | APOL1  | c.1164delTTATAA (G2), c.1024A>G (G1) | Compound heterozygous | Variant pathogenic        | rs73885319 and rs143830837  |
| 26 | FSGS | 3.7  | 1.1 | 32 | M | His   | CFI    | c.148C>G                             | Heterozygous          | Variant Likely Pathogenic | rs144082872                 |
| 27 | FSGS | 1.2  | 2.1 | 33 | M | Cau   | COL4A3 | c.3829G>A                            | Heterozygous          | VUS                       | rs190598500                 |
| 28 | FSGS | 7.1  | 5   | 35 | F | Cau   | COL4A4 | c.2563G>A                            | Heterozygous          | Variant Likely Pathogenic | none                        |
| 29 | FSGS | 8.2  | 3   | 24 | M | Cau   | COL4A5 | c.4298G>T                            | Hemizygous            | Variant pathogenic        | rs281874735                 |
| 30 | FSGS | 0.7  | 1.2 | 13 | F | His   | COL4A5 | c.834+8C>A                           | Heterozygous          | VUS                       | rs201717817                 |
| 31 | FSGS | 0.9  | 9.4 | 5  | M | Cau   | COQ2   | c.683A>G                             | Homozygous            | Variant pathogenic        | rs121918232                 |
| 32 | FSGS | 0.8  | 5   | 5  | F | Af Am | COQ6   | c.145G>T and c.1184C>T               | unknown               | VUS                       | rs61743884 and rs34746680   |
| 33 | FSGS | 0.6  | 4   | 6  | M | Cau   | CRB2   | c.1828C>T                            | Homozygous            | VUS                       | rs145286619                 |
| 34 | FSGS | 1.1  | 5   | 18 | F | Cau   | CRB2   | c.471C>T and c.2680G>A               | unknown               | VUS                       | rs113157023 and rs144714250 |
| 35 | FSGS | 1.9  | 4.2 | 34 | F | Cau   | INF2   | c.628G>A                             | Heterozygous          | Variant Likely Pathogenic | none                        |
| 36 | FSGS | 2    | 2.5 | 37 | F | His   | INF2   | c.653G>A                             | Heterozygous          | Variant pathogenic        | rs267607183                 |
| 37 | FSGS | 9.9  |     | 32 | M | Cau   | INF2   | c.820G>A                             | Heterozygous          | VUS                       | none                        |
| 38 | FSGS | 7.7  | 6   | 37 | F | Asian | PKD2   | c.734A>G                             | Heterozygous          | VUS                       | none                        |
| 39 | FSGS | 11.1 | 6.8 | 31 | M | His   |        |                                      |                       | none                      |                             |

|    |      |     |     |    |   |       |      |
|----|------|-----|-----|----|---|-------|------|
| 40 | FSGS | 1.4 | 6.3 | 21 | F | Asian | None |
| 41 | FSGS | 5   | 4.4 | 18 | M | Af Am | None |
| 42 | FSGS | 5   | 4   | 26 | M | Af Am | None |
| 43 | FSGS | 5.7 | 10  | 34 | M | Af Am | None |
| 44 | FSGS | 0.8 | 21  | 33 | M | His   | none |
| 45 | FSGS | 0.3 | 6   | 3  | F | His   | none |
| 46 | FSGS | 2.3 | 4   | 33 | F | His   | None |
| 47 | FSGS | 14  | 2   | 26 | M | Cau   | None |
| 48 | FSGS | 2.2 | 5   | 23 | M | Cau   | None |
| 49 | FSGS | 10  | 4.5 | 21 | M | Cau   | None |
| 50 | FSGS | 0.5 | 6   | 14 | F | Cau   | None |

Abbreviations: Af Am, African American; Cau, Caucasian; CKD, chronic kidney disease; FSGS, focal segmental glomerulosclerosis; His, Hispanic; Mid East, Middle Eastern; VUS, variant of uncertain significance.

\*Variant classification according to ACMG guidelines<sup>1</sup>

---

<sup>1</sup> Richards S, Aziz N, Bale S, et al. Standards and guidelines for the interpretation of sequence variants: a joint consensus recommendation of the American College of Medical Genetics and Genomics and the Association for Molecular Pathology. *Genet Med*. 2015; 17: 405-424.
